# Supplementary material for: Achieving 10% efficiency in non-fullerene all-small-molecule organic solar cells without extra treatments
Source: Royal Society of Chemistry journal article supplement (doi:10.1039/d1ta01680f), 2021-01-01
Supplement: d1ta01680f1.pdf [file d1ta01680f1.pdf]

## **Achieving 10% efficiency in non-fullerene all-small-molecules organic solar cells without extra treatments**

*Daobin Yang,<sup>a,b,\*</sup> Kuibao Yu,<sup>a</sup> Jun Xu,<sup>a</sup> Jinsheng Zhang,<sup>a,b</sup> Jianqi Zhang,<sup>c</sup> Jing Gao,<sup>a,b</sup> Wei Song,<sup>a,b</sup> Dandan Li,<sup>a,b</sup> Zhenyu Chen,<sup>a,b</sup> and Ziyi Ge<sup>a,b,\*</sup>*

<sup>a</sup> Ningbo Institute of Materials Technology and Engineering, Chinese Academy of Sciences, Ningbo 315201, China.

<sup>b</sup> Center of Materials Science and Optoelectronics Engineering, University of Chinese Academy of Sciences, Beijing 100049, China

<sup>c</sup> CAS Key Laboratory of Nanosystem and Hierarchical Fabrication, CAS Center for Excellence in Nanoscience, National Center for Nanoscience and Technology, Beijing 100190, China.

### **Corresponding Authors**

\*Daobin Yang, E-mail: yangdaobin@nimte.ac.cn

\*Ziyi Ge, E-mail: geziyi@nimte.ac.cn

**Table S1.** The performances for the reported small molecules: Y6-based organic solar cells devices

| No. | D : A              | Treatments          | V <sub>oc</sub><br>(V) | J <sub>sc</sub><br>(mA cm <sup>-2</sup> ) | FF<br>(%)    | PCE<br>(%)  | References                                      |
|-----|--------------------|---------------------|------------------------|-------------------------------------------|--------------|-------------|-------------------------------------------------|
| 1   | BSFTR : Y6         | <b>As-cast</b>      | <b>0.94</b>            | <b>0.97</b>                               | <b>23.78</b> | <b>0.22</b> | Adv. Mater.,<br>2019, 31,<br>1904283            |
|     |                    | TA (120°C/5min)     | 0.85                   | 22.86                                     | 64.87        | 12.56       |                                                 |
|     |                    | SVA (CF) +TA        | 0.85                   | 23.16                                     | 69.66        | 13.69       |                                                 |
| 2   | BTR : Y6           | <b>As-cast</b>      | --                     | --                                        | --           | --          | Joule, 2019, 3,<br>3034-3047;                   |
|     |                    | TA (100°C/10min)    | 0.85                   | 22.25                                     | 56.4         | 10.67       |                                                 |
|     | BTR : Y6           | <b>As-cast</b>      | <b>0.86</b>            | <b>16.42</b>                              | <b>43.2</b>  | <b>6.13</b> | Org. Electron.,<br>2020, 105904.                |
|     |                    | TA (110°C/10min)    | 0.85                   | 20.18                                     | 70.5         | 12.12       |                                                 |
| 3   | BTR-Cl : Y6        | <b>As-cast</b>      | --                     | --                                        | --           | --          | Adv. Energy<br>Mater. 2020,<br>10, 2001076.     |
|     |                    | TA (120°C/10min)    | 0.86                   | 24.17                                     | 65.5         | 13.61       |                                                 |
| 4   | ZR1 : Y6           | <b>As-cast</b>      | <b>0.876</b>           | <b>14.23</b>                              | <b>40.50</b> | <b>5.05</b> | Nat. Commun.,<br>2019, 10, 5393                 |
|     |                    | TA (120°C/10min)    | 0.861                  | 24.34                                     | 68.44        | 14.34       |                                                 |
| 5   | BOHTR : Y6         | <b>As-cast</b>      | <b>0.85</b>            | <b>8.3</b>                                | <b>28.3</b>  | <b>2.1</b>  | Sol. RRL, 2020,<br>4, 1900326                   |
|     |                    | TA (115°C/10min)    | 0.82                   | 22.5                                      | 52.5         | 10.8        |                                                 |
| 6   | BIHTR : Y6         | <b>As-cast</b>      | <b>0.72</b>            | <b>2.2</b>                                | <b>23.0</b>  | <b>0.5</b>  |                                                 |
|     |                    | TA (115°C/10min)    | 0.84                   | 21.5                                      | 66.9         | 12.3        |                                                 |
| 7   | DCAO3TBDTT<br>: Y6 | <b>As-cast</b>      | <b>0.917</b>           | <b>2.74</b>                               | <b>21.38</b> | <b>0.54</b> | Angew. Chem.<br>Int. Ed. 2020,<br>59, 2808-2815 |
|     |                    | TA (105°C/10min)+CN | 0.804                  | 21.71                                     | 60.95        | 10.64       |                                                 |
| 8   | BTEC-1F : Y6       | <b>As-cast</b>      | <b>0.941</b>           | <b>4.92</b>                               | <b>22.59</b> | <b>1.05</b> |                                                 |
|     |                    | TA (105°C/10min)    | 0.870                  | 21.21                                     | 61.35        | 11.33       |                                                 |
| 9   | BTEC-2F : Y6       | <b>As-cast</b>      | <b>0.895</b>           | <b>14.51</b>                              | <b>51.54</b> | <b>6.69</b> |                                                 |
|     |                    | TA (105°C/10min)+CN | 0.854                  | 21.55                                     | 72.35        | 13.34       |                                                 |
| 10  | BT-2F : Y6         | <b>As-cast</b>      | <b>0.874</b>           | <b>17.08</b>                              | <b>59.84</b> | <b>8.94</b> | J. Mater. Chem.<br>A, 2020, 8,<br>7405-7411     |
|     |                    | TA (100°C/10min)    | 0.853                  | 22.38                                     | 72.27        | 13.80       |                                                 |
| 11  | BDTT-TR : Y6       | <b>As-cast</b>      | <b>0.868</b>           | <b>0.61</b>                               | <b>22.25</b> | <b>0.12</b> | Sci. China<br>Chem., 2020,<br>63, 1246-1255     |
|     |                    | TA (140°C/2min)     | 0.780                  | 23.64                                     | 66.06        | 12.18       |                                                 |
| 12  | TBFT-TR : Y6       | <b>As-cast</b>      | <b>0.879</b>           | <b>0.95</b>                               | <b>22.18</b> | <b>0.19</b> |                                                 |

|    |            |                  |              |              |             |             |                                             |
|----|------------|------------------|--------------|--------------|-------------|-------------|---------------------------------------------|
|    |            | TA (140°C/2min)  | 0.784        | 24.59        | 72.78       | 14.03       |                                             |
| 13 | SM1 : Y6   | <b>As-cast</b>   | <b>0.897</b> | <b>2.70</b>  | <b>21.9</b> | <b>0.53</b> | Adv. Mater.<br>2020, 32,<br>1908373         |
|    |            | TA (120°C/10min) | 0.805        | 23.59        | 67.0        | 12.72       |                                             |
| 14 | SM1-S : Y6 | <b>As-cast</b>   | <b>0.921</b> | <b>1.26</b>  | <b>20.2</b> | <b>0.23</b> |                                             |
|    |            | TA (120°C/10min) | 0.825        | 23.23        | 37.7        | 12.94       |                                             |
| 15 | SM1-F : Y6 | <b>As-cast</b>   | <b>0.936</b> | <b>7.46</b>  | <b>24.6</b> | <b>1.72</b> |                                             |
|    |            | TA (120°C/10min) | 0.866        | 23.25        | 69.9        | 14.07       |                                             |
| 16 | FG3 : Y6   | <b>As-cast</b>   | <b>0.94</b>  | <b>15.08</b> | <b>57.0</b> | <b>8.08</b> | Sol. RRL, 2020,<br>4, 2000460               |
|    |            | SVA (THF)        | 0.90         | 18.38        | 65.0        | 10.75       |                                             |
| 17 | FG4 : Y6   | <b>As-cast</b>   | <b>0.84</b>  | <b>16.49</b> | <b>60.0</b> | <b>8.31</b> |                                             |
|    |            | SVA (THF)        | 0.79         | 20.92        | 67.0        | 11.07       |                                             |
| 18 | ZR2-C3: Y6 | <b>As-cast</b>   | <b>0.898</b> | <b>13.93</b> | <b>34.6</b> | <b>4.33</b> | Adv. Funct.<br>Mater. 2020,<br>30, 2005426. |
|    |            | TA (120°C/10min) | 0.854        | 24.70        | 70.0        | 14.78       |                                             |

## 1. Experimental section

### 1.1 Instruments and characterization

<sup>1</sup>H NMR and <sup>13</sup>C NMR spectra were recorded on Bruker (AVANCE III 400MHz). High resolution time of flight mass spectrometer (TOF-MS) was obtained from AB Sciex (TripleTOF 4600). Thermogravimetric analysis (TGA) was under taken using a PerkinElmer (Diamond TG/DTA) under N<sub>2</sub> atmosphere at a heating rate of 10 °C min<sup>-1</sup>. Absorption spectra of both solution and thin-film samples of the objective compounds were recorded using a Perkin Elmer (Lambda 950) UV-Vis scanning spectrophotometer. The solution samples were prepared in chloroform solution at a concentration of 2.0×10<sup>-5</sup> mol L<sup>-1</sup>, while the film samples were obtained by spin-coating from chloroform solution (5 mg mL<sup>-1</sup>, 2000 rpm) on quartz substrates.

The morphologies of the active layers were analyzed through atomic force microscopy (AFM) in tapping mode under ambient conditions using Bruker (Dimension ICON) instrument. GI-WAXS measurements were performed on a XEUSS SAXS/WAXS system (XENOCS, France) at the National Center for Nanoscience and Technology. The

wavelength of the X-ray beam is 1.54 Å, and the incident angle was 0.18°. Scattered X-rays were detected by using a Dectris Pilatus 300 K photon counting detector. The blend films for GI-WAXS and AFM were made by the same method for device active layer except for the substrate as Si/PEDOT:PSS.

The Cyclic Voltammetry (CV) measurement was carried out in  $2.0 \times 10^{-4}$  mol L<sup>-1</sup> anhydrous dichloromethane (DCM) with 0.1 mol L<sup>-1</sup> tetrabutyl ammonium perchlorate (Bu<sub>4</sub>NClO<sub>4</sub>, as supporting electrolyte) under an argon atmosphere at a scan rate of 0.1 V s<sup>-1</sup> using a PC controlled LK 2006A electrochemical workstation. The CV system was constructed using a Pt disk as the working electrode, a Pt wire as the counter electrode, and a Ag/AgNO<sub>3</sub> (0.1 mol L<sup>-1</sup> in acetonitrile) electrode as the reference electrode. Ferrocene was used as an internal standard. The electrochemical potential was internally calibrated against the standard ferrocene/ferrocenium redox couple (Fc/Fc<sup>+</sup>), which has a known reduction potential of -4.80 eV relative to vacuum level. The HOMO and LUMO of the objective compounds are calculated according to the following equations:

$$\text{HOMO} = -[E_{ox}^{onest} + 4.8]$$

$$\text{LUMO} = -[E_{red}^{onest} + 4.8]$$

Where  $E_{ox}^{onest}$  and  $E_{red}^{onest}$  are the onset of oxidation potential and reduction potential vs. Fe/Fe<sup>+</sup>, respectively.

## 1.2 SCLC measurement

Hole-only and electron-only devices were fabricated with the structure of ITO/MoO<sub>3</sub>/SM:Y6 (100 nm)/MoO<sub>3</sub>/Ag and ITO/ZnO/SM:Y6 (100 nm)/PDINO/Al, respectively. Mobilities were extracted by fitting the current density-voltage curves using space charge limited current (SCLC), the  $J$ - $V$  curves of the devices were plotted as  $J^{0.5}$  versus  $V$  using Eq. 1:

$$J = \frac{9}{8} \frac{\epsilon_r \times \epsilon_o \times \mu \times V^2}{L^3} \exp\left(0.89\beta\sqrt{\frac{V}{L}}\right) \quad (1)$$

where  $J$  is current density,  $L$  is film thickness of active layer,  $\mu_h$  is hole mobility,  $\mu_e$  is

electron mobility,  $\epsilon_r$  is relative dielectric constant of the transport medium,  $\epsilon_0$  is permittivity of free space ( $8.85 \times 10^{-12} \text{ F m}^{-1}$ ),  $V (= V_{\text{appl}} - V_{\text{bi}})$  is the internal voltage in the device, where  $V_{\text{appl}}$  is the applied voltage to the device and  $V_{\text{bi}}$  is the built-in voltage due to the relative work function difference of the two electrodes.

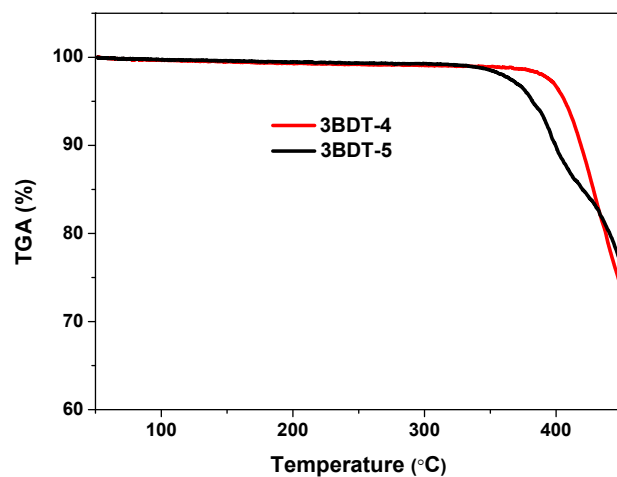

**Figure S1.** TGA curves of 3BDT-4 and 3BDT-5.

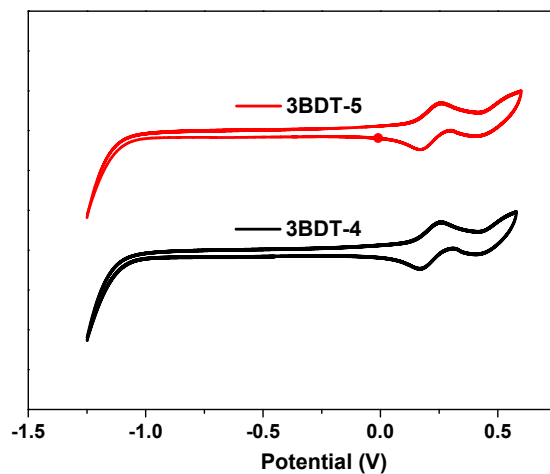

**Figure S2.** Cyclic voltammogram of 3BDT-4 and 3BDT-5.

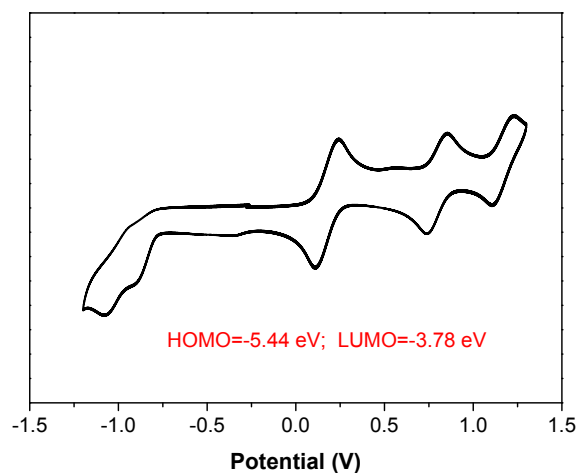

**Figure S3.** Cyclic voltammogram of the non-fullerene acceptor Y6.

**Table S2.** Photovoltaic performances of ASM-OSCs based on 3BDT-4:Y6 with different weight ratios without extra treatments.

| Active layers          | $V_{oc}$<br>[V] | $J_{sc}$<br>[mA cm <sup>-2</sup> ] | FF    | PCE <sup>a)</sup><br>[%] |
|------------------------|-----------------|------------------------------------|-------|--------------------------|
| 3BDT-4 : Y6 = 1 : 0.50 | 0.832           | 16.5                               | 0.407 | 5.59 (5.48)              |
| 3BDT-4 : Y6 = 1 : 0.55 | 0.829           | 17.0                               | 0.413 | 5.82 (5.68)              |
| 3BDT-4 : Y6 = 1 : 0.90 | 0.816           | 16.1                               | 0.405 | 5.32 (5.21)              |

<sup>a)</sup> Average values of 4 individual cells were given in parentheses.

**Table S3.** Photovoltaic performances of ASM-OSCs based on 3BDT-5:Y6 with different weight ratios without extra treatments.

| Active layers          | $V_{oc}$<br>[V] | $J_{sc}$<br>[mA cm <sup>-2</sup> ] | FF    | PCE <sup>a)</sup><br>[%] |
|------------------------|-----------------|------------------------------------|-------|--------------------------|
| 3BDT-5 : Y6 = 1 : 0.50 | 0.844           | 20.9                               | 0.551 | 9.72 (9.40)              |
| 3BDT-5 : Y6 = 1 : 0.55 | 0.840           | 21.3                               | 0.581 | 10.4 (10.0)              |
| 3BDT-5 : Y6 = 1 : 0.90 | 0.825           | 19.6                               | 0.503 | 8.13 (7.86)              |

<sup>a)</sup> Average values of 4 individual cells were given in parentheses.

**Table S4.** Photovoltaic performances of ASM-OSCs based on 3BDT-5:Y6 (1:0.55, weight ratio) with different thermal annealing (TA) treatments.

| Active layers   | $V_{oc}$<br>[V] | $J_{sc}$<br>[mA cm <sup>-2</sup> ] | FF    | PCE <sup>a)</sup><br>[%] |
|-----------------|-----------------|------------------------------------|-------|--------------------------|
| As-cast         | 0.840           | 21.3                               | 0.581 | 10.4 (10.0)              |
| TA 80 °C/10min  | 0.832           | 21.6                               | 0.590 | 10.6 (10.4)              |
| TA 100 °C/10min | 0.829           | 22.1                               | 0.600 | 11.0 (10.7)              |
| TA 120 °C/10min | 0.815           | 19.5                               | 0.635 | 10.1 (9.85)              |
| TA 140 °C/10min | 0.780           | 19.7                               | 0.613 | 9.42 (9.20)              |

a) Average values of 4 individual cells were given in parentheses.

**Table S5.** Photovoltaic performances of ASM-OSCs based on 3BDT-5:Y6 (1:0.55, weight ratio) with different solvent vapor annealing (SVA) treatments using Chloroform as solvent.

| Active layers<br>Treatments | $V_{oc}$<br>[V] | $J_{sc}$<br>[mA cm <sup>-2</sup> ] | FF    | PCE <sup>a)</sup><br>[%] |
|-----------------------------|-----------------|------------------------------------|-------|--------------------------|
| As-cast                     | 0.840           | 21.3                               | 0.581 | 10.4 (10.0)              |
| SVA 60s                     | 0.841           | 20.7                               | 0.542 | 9.44 (9.23)              |
| SVA 90s                     | 0.834           | 22.1                               | 0.571 | 10.5 (10.2)              |
| SVA 120s                    | 0.831           | 20.0                               | 0.509 | 8.46 (8.30)              |

a) Average values of 4 individual cells were given in parentheses.

**Table S6.** Photovoltaic performances of ASM-OSCs based on 3BDT-4:Y6 (1:0.55, weight ratio) with different thermal annealing treatments.

| Active layers   | $V_{oc}$<br>[V] | $J_{sc}$<br>[mA cm <sup>-2</sup> ] | FF    | PCE <sup>a)</sup><br>[%] |
|-----------------|-----------------|------------------------------------|-------|--------------------------|
| As-cast         | 0.829           | 17.0                               | 0.413 | 5.82 (5.68)              |
| TA 80 °C/10min  | 0.820           | 18.2                               | 0.428 | 6.39 (6.30)              |
| TA 100 °C/10min | 0.815           | 17.3                               | 0.447 | 6.30 (6.22)              |
| TA 120 °C/10min | 0.803           | 16.5                               | 0.459 | 6.08 (5.96)              |

a) Average values of 4 individual cells were given in parentheses.

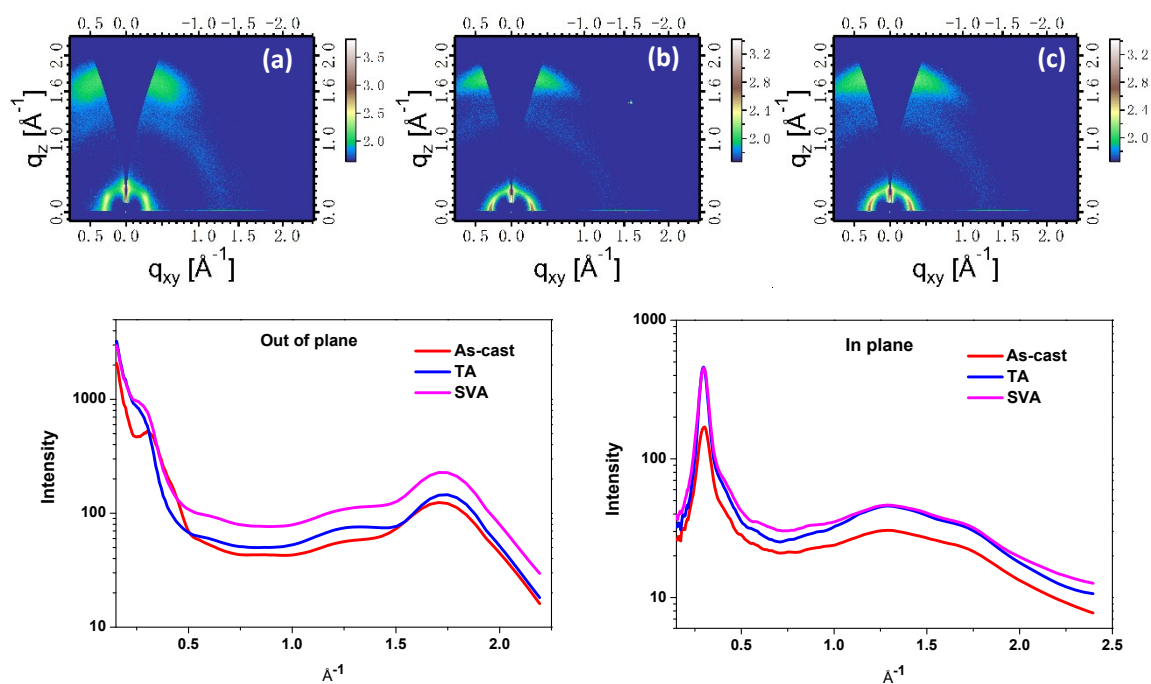

**Figure S4.** 2D GIWAXS patterns of the as-cast 3BDT-5:Y6 blend films (a), with TA (b), with SVA (c), and the corresponding out-of-plane and in-plane line cuts of the blend films.
